# Supplementary material
Source: publisher site journal article supplement (https://www.dovepress.com/article/234920)
Supplement: Supplementary file 1 [file get_supplementary_file.php]

**Supplement Data**

Activated hepatic stellate cells (HSCs) exert immunosuppressive effects in hepatocellular carcinoma by producing complement C3

Yaping Xu, Yihao Huang, Wanqiong Xu, Xiaohui Zheng, Liyue Huang, Yuxiao Wang, Xue Yi, Kangni Wu

**Supplement figure 1.**


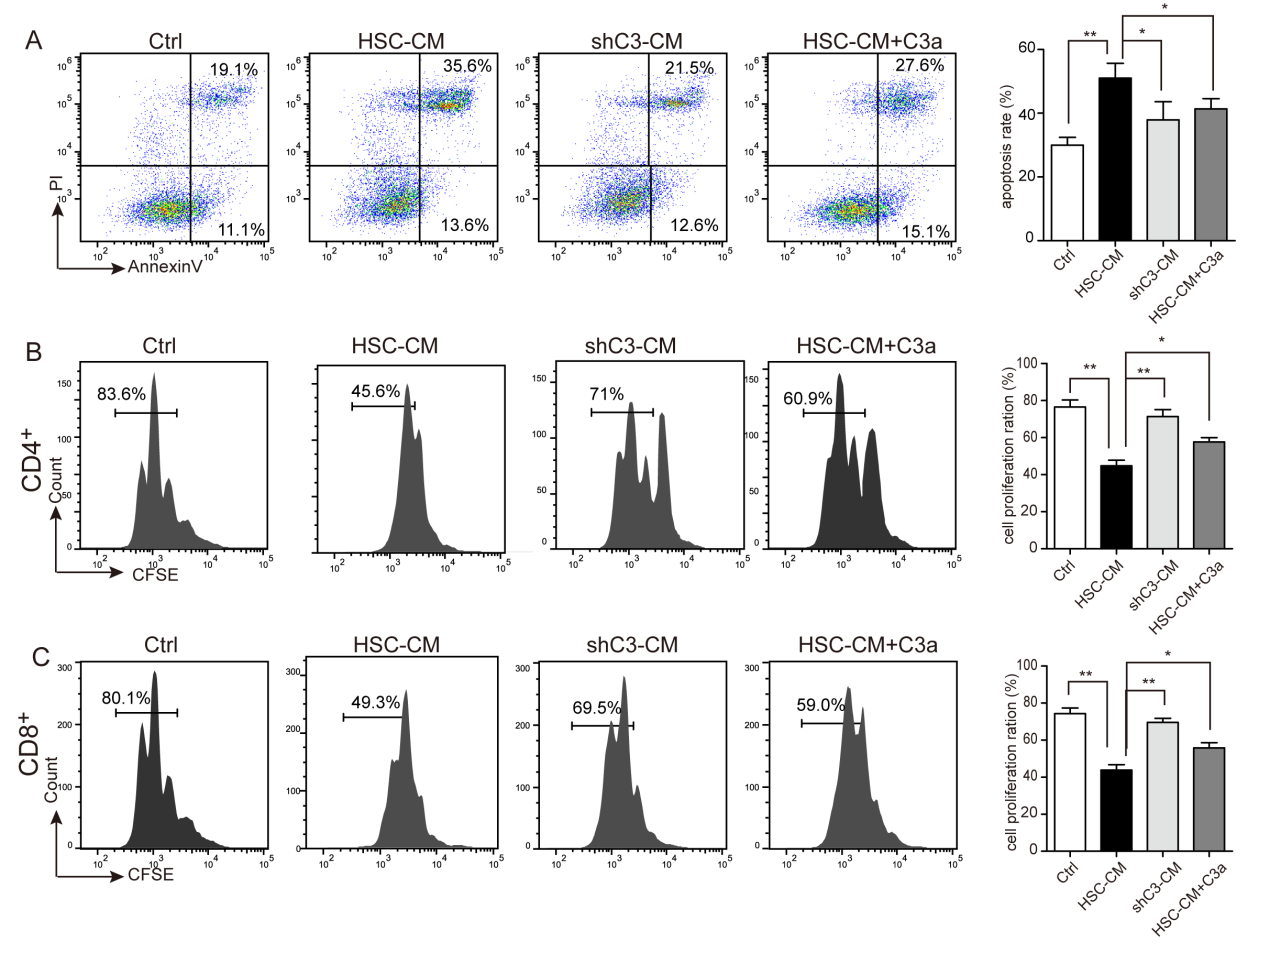
 **HSCs induces T cells apoptosis and suppresses T cells proliferation through C3 pathway**. T cells were co-cultured with Ctrl (1640 medium), HSC-CM (conditional medium from HSCs) , shC3-CM (conditional medium from shC3 HSCs), or HSC-CM supplement with C3a 0.3μg/ml followed by measurement of (A) apoptosis using Annexin V/PI assay after co-cultured for 24h and (B-C) proliferation of CD4+ a**nd C**D8+ T cells after co-cultured for 72h using CFSE staining assay. T cells were simulated with CD3 and CD28 antibody. The statistical significance was labeled as *, p < 0.05; **, p < 0.01; n = 3.

**Supplement figure 2**.


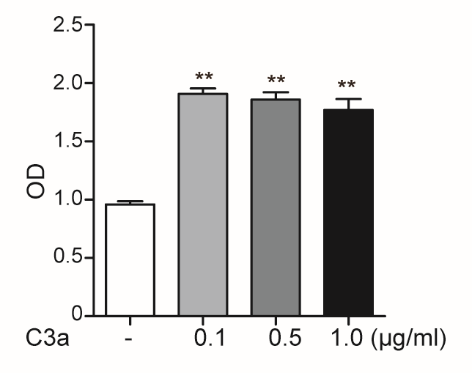


**The effect of C3a on the growth of H22 cells.** The H22 was cultured with recombinant mouse complement component C3a for 24h, the cell proliferation was detected by CCK8. ** p < 0.01, n =4, vs control group.
